# Supplementary figures and images for: Differences between cardiogenic shock related to acute decompensated heart failure and acute myocardial infarction
Source: PubMed Central journal article supplement — ESC Heart Fail. 2023 Sep 18;10(6):3472–82. doi: 10.1002/ehf2.14510 (PMC10682868; doi:10.1002/ehf2.14510), 2023-09-18

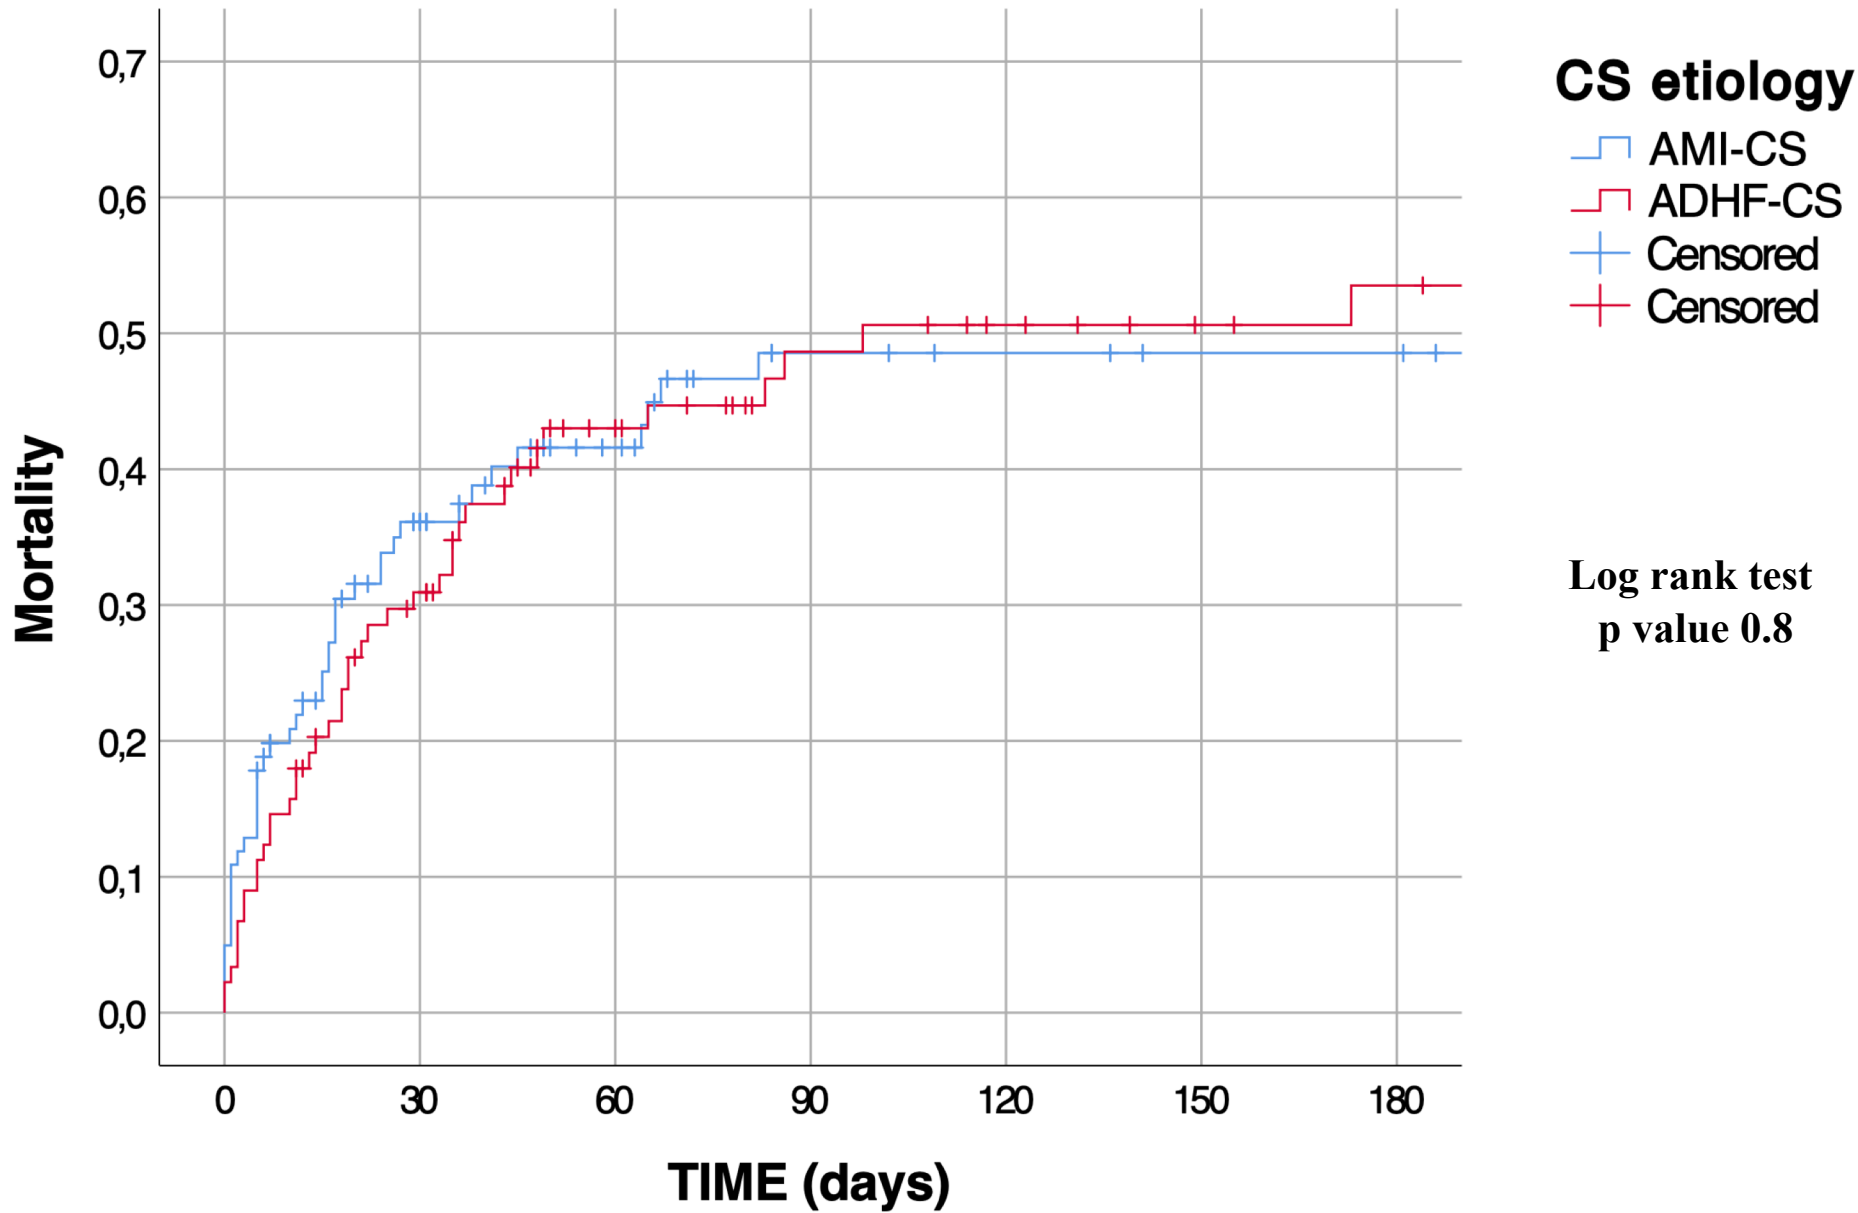

Supplement: EHF2-10-3472-s002.pdf [file EHF2-10-3472-s002.pdf]
